# Supplementary material
Source: PubMed Central journal article supplement (PMC9177724)
Supplement: NIHMS1787823-supplement-3.pdf [file NIHMS1787823-supplement-3.pdf]

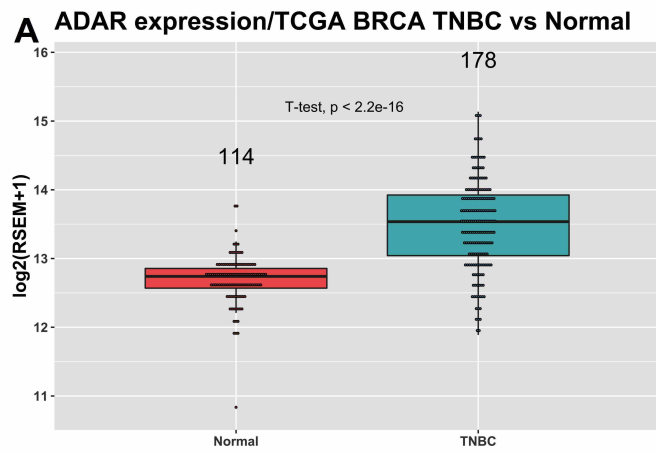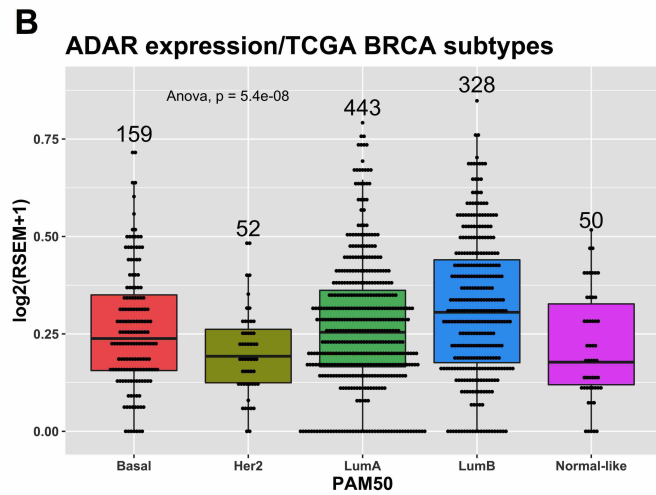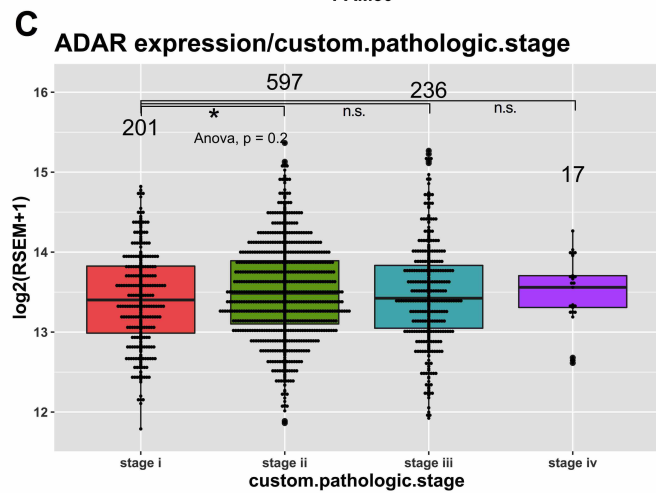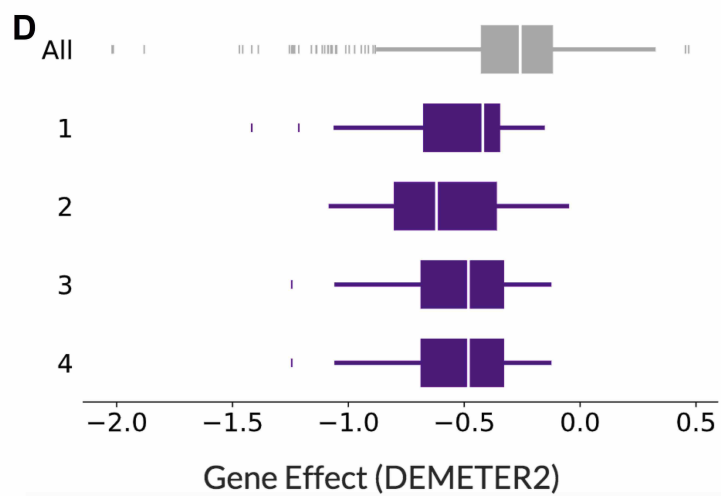

1. Esophagus ( $1.7 \times 10^{-4}$ ) n=24
2. Basal A ( $2.8 \times 10^{-4}$ ) n=15
3. Upper Aerodigestive ( $3.9 \times 10^{-4}$ ) n=19
4. Upper Aerodigestive Squamous ( $3.9 \times 10^{-4}$ ) n=19

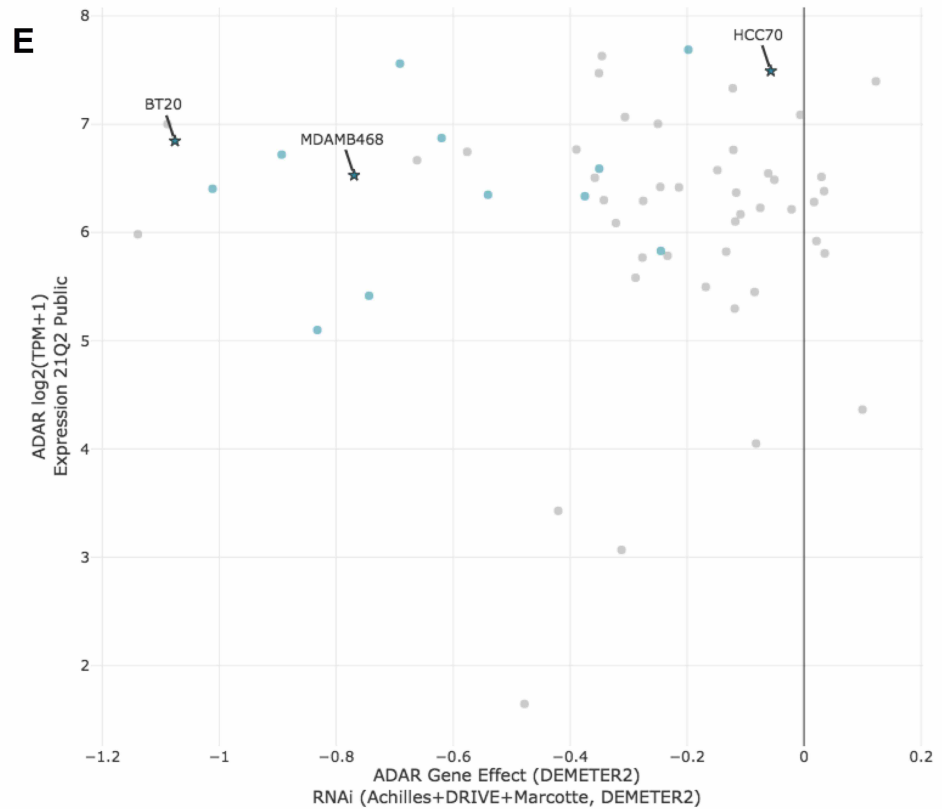

Figure S1

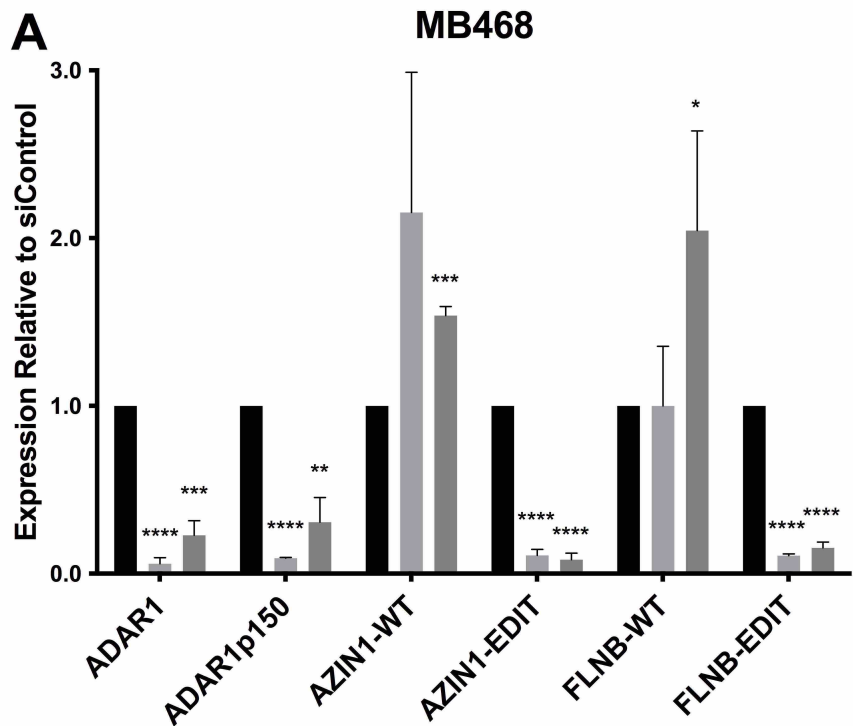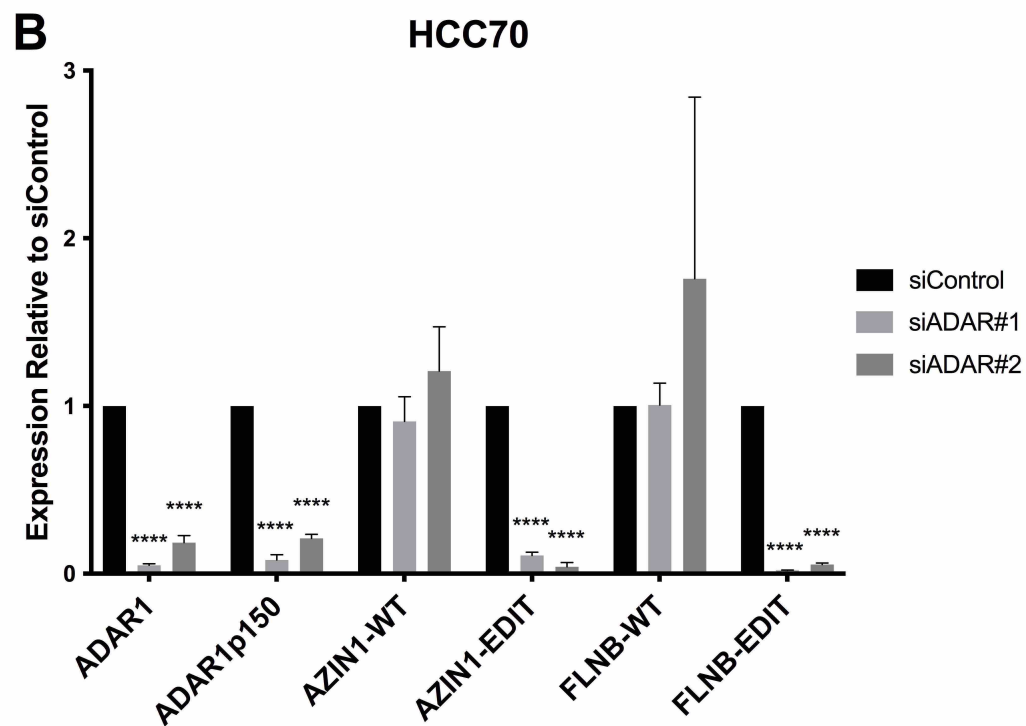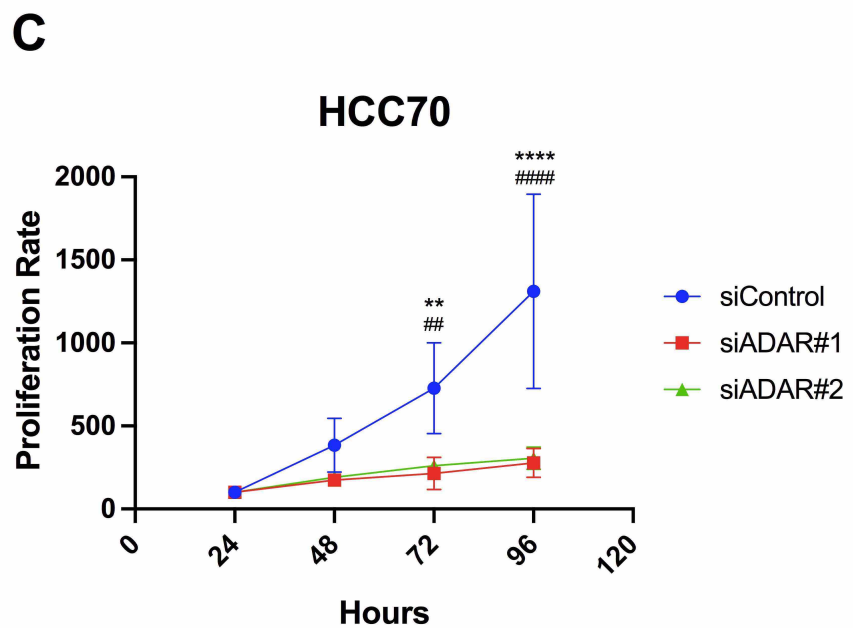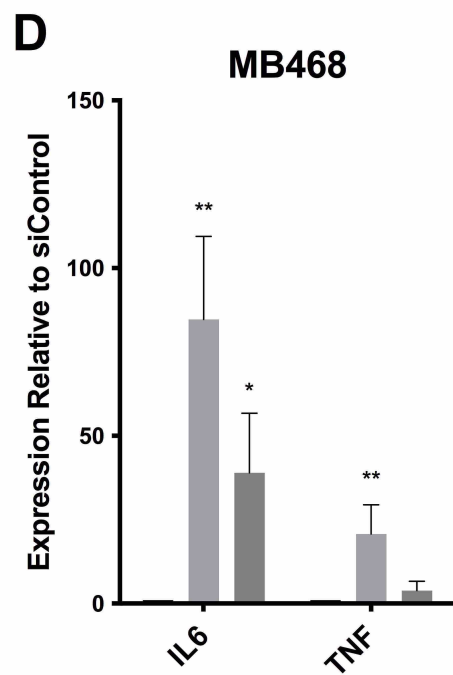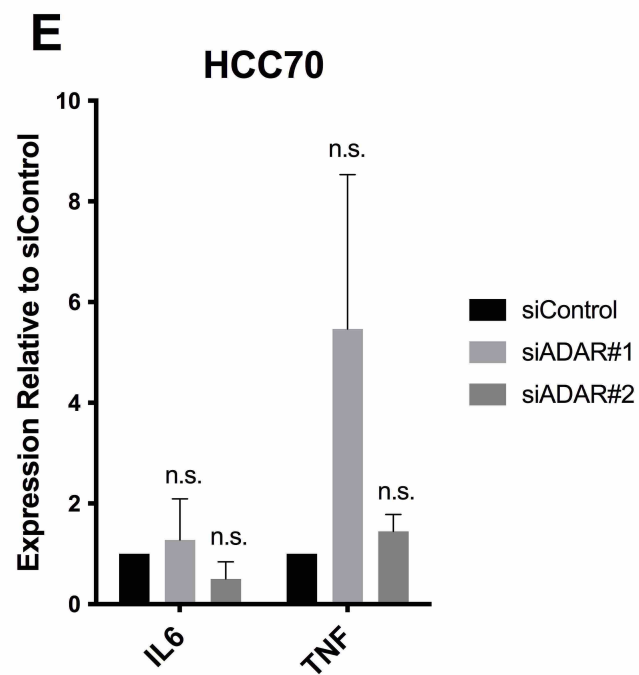

Figure S2

**A**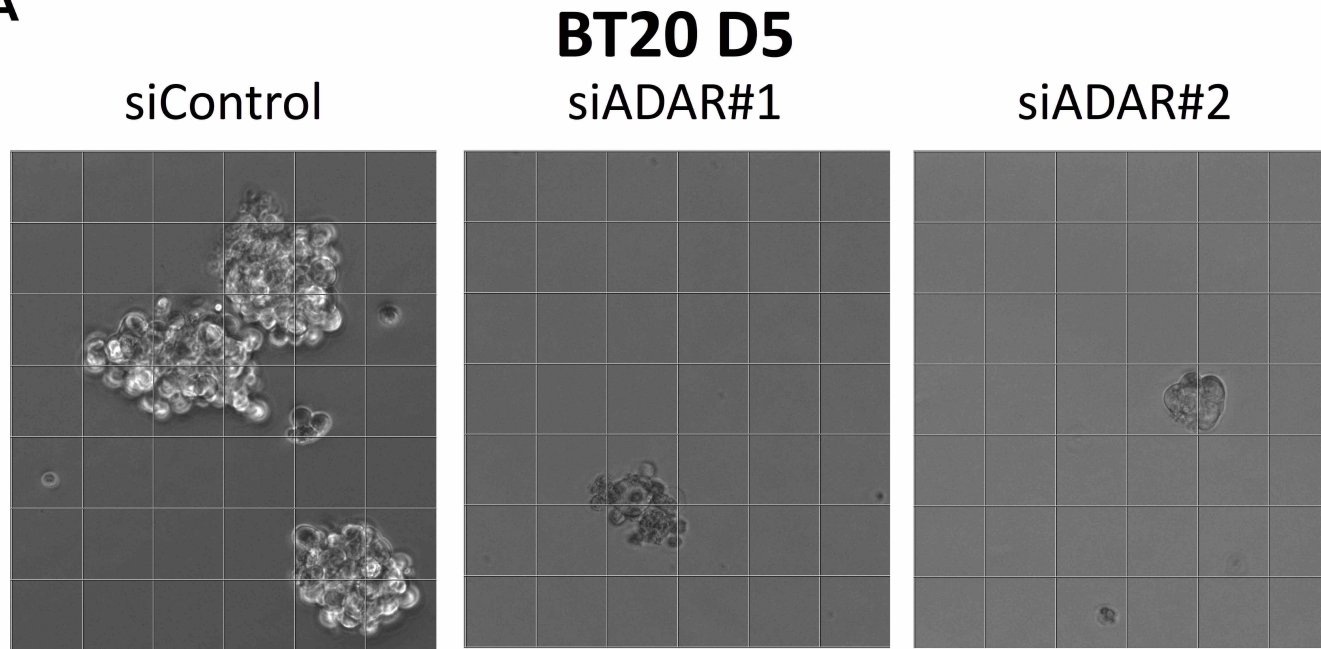**B**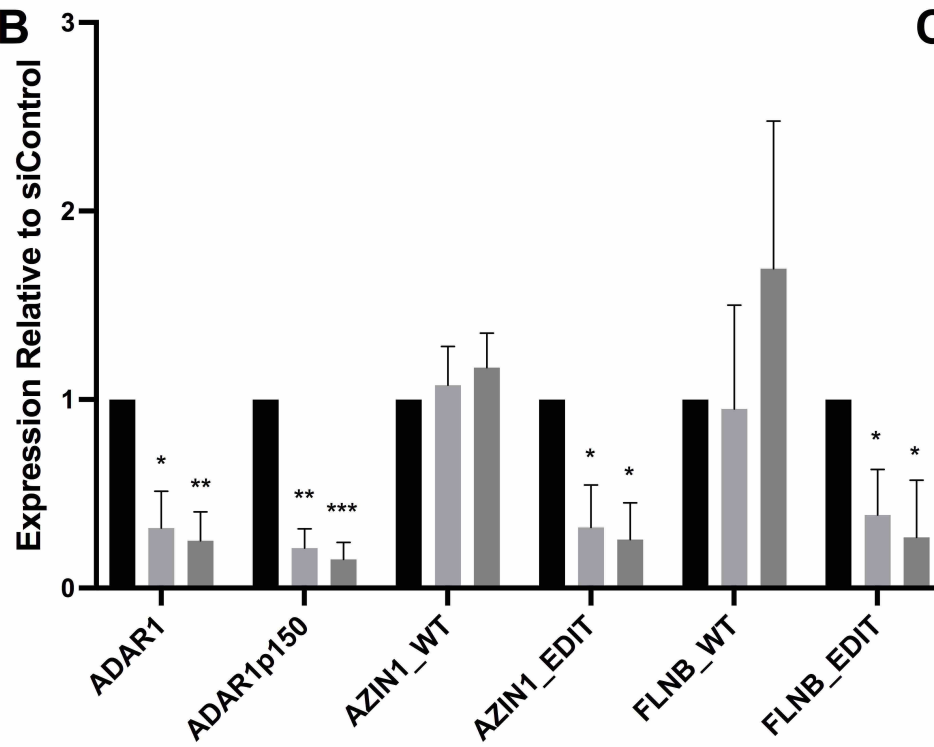**C**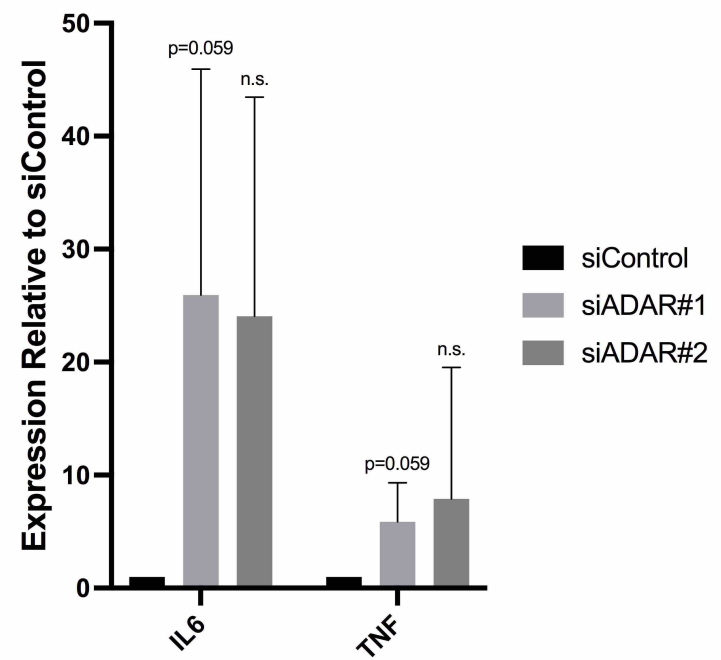

Figure S3

**A**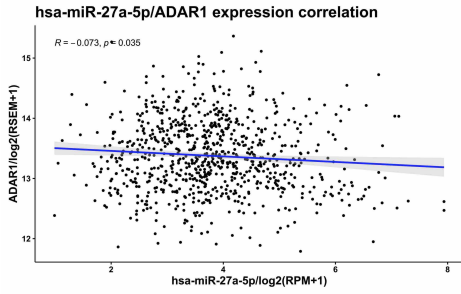**B**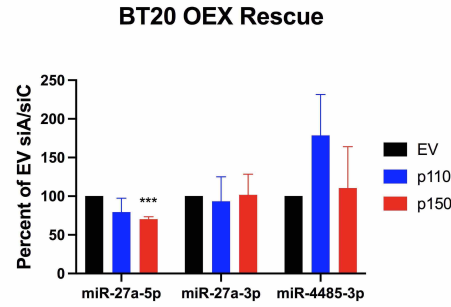**C**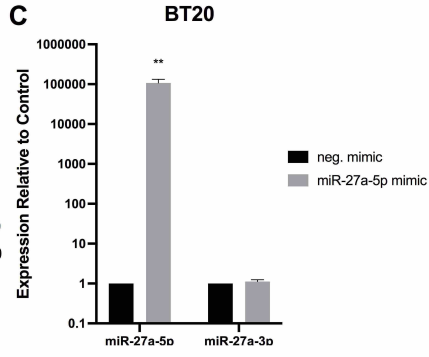**D**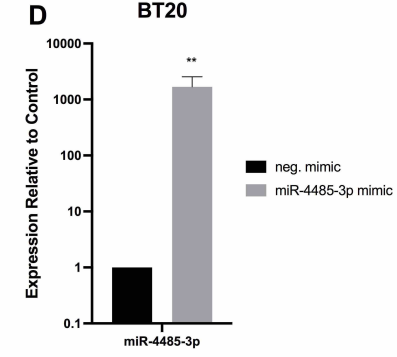**F**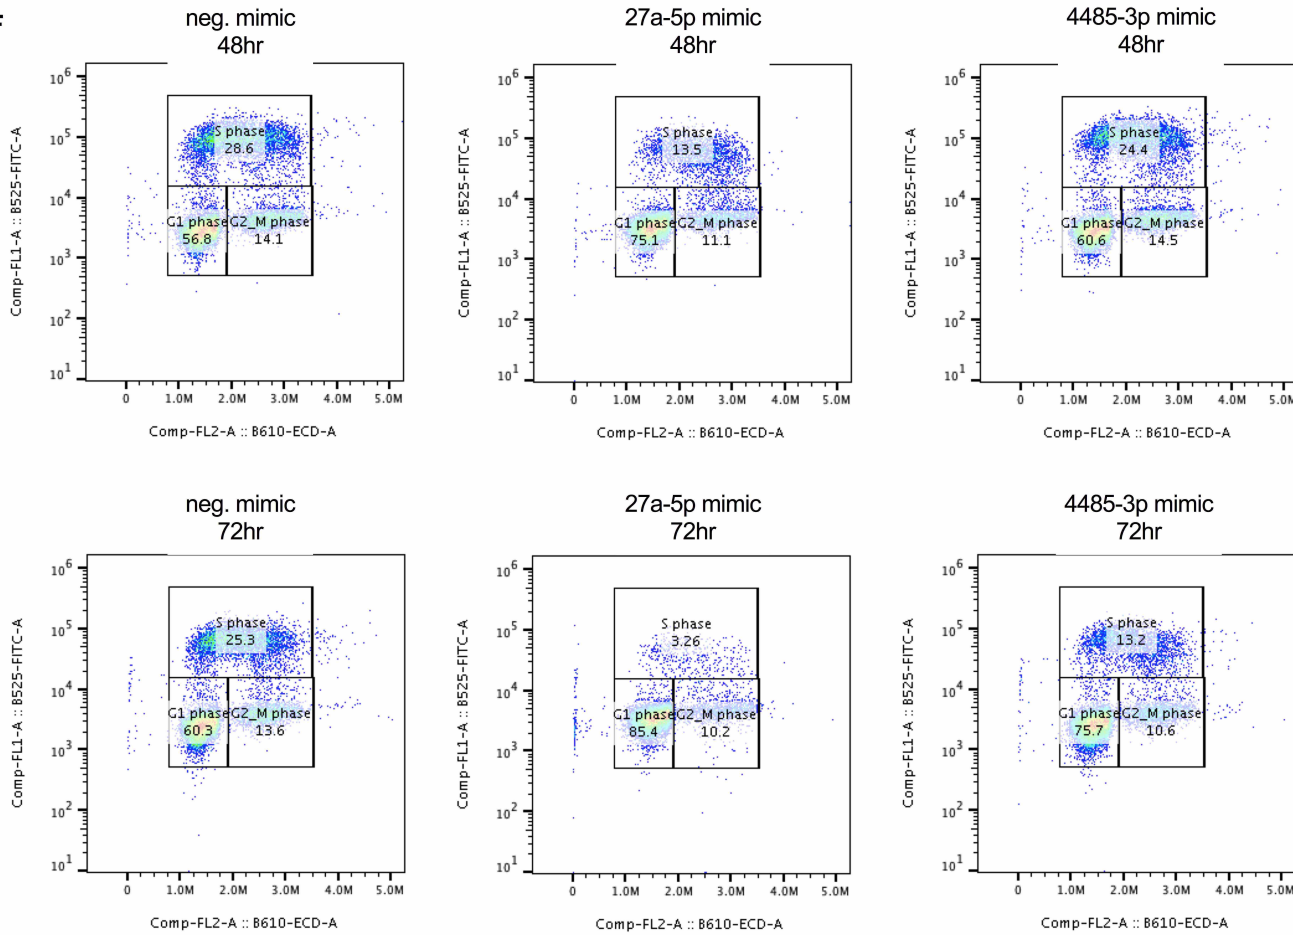**E**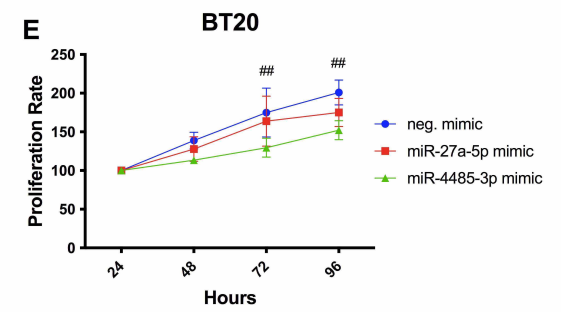**G**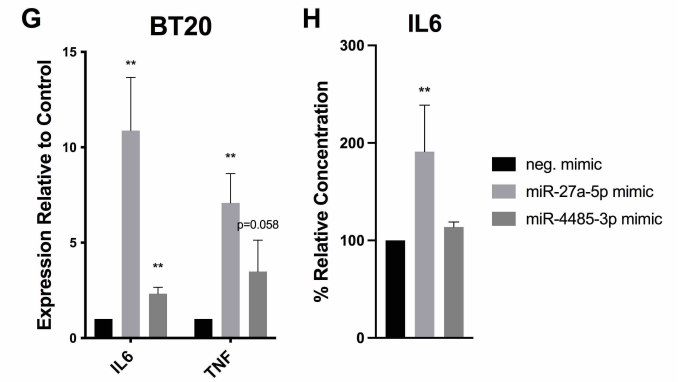**H**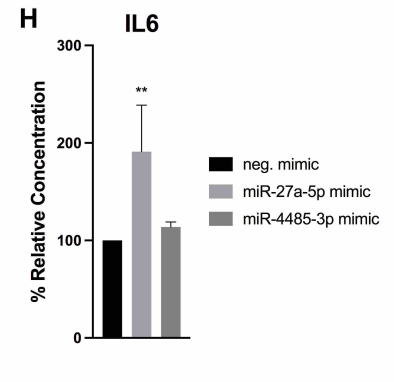

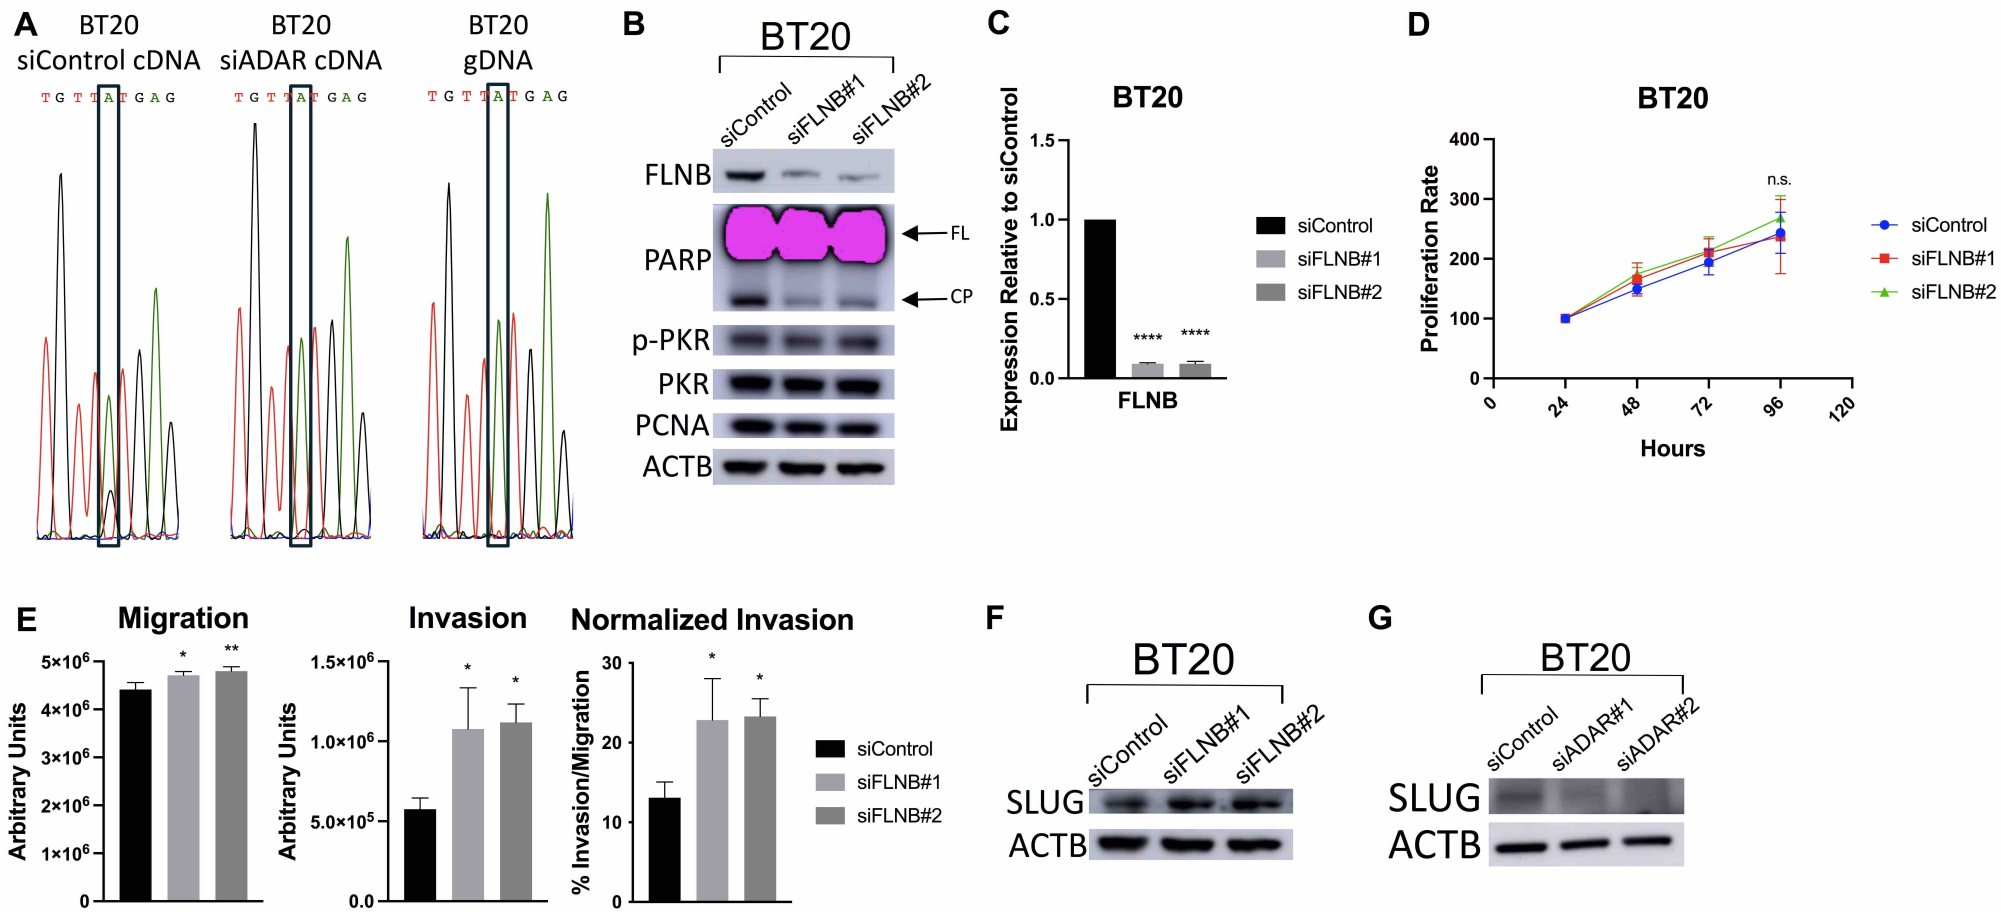

Figure S5

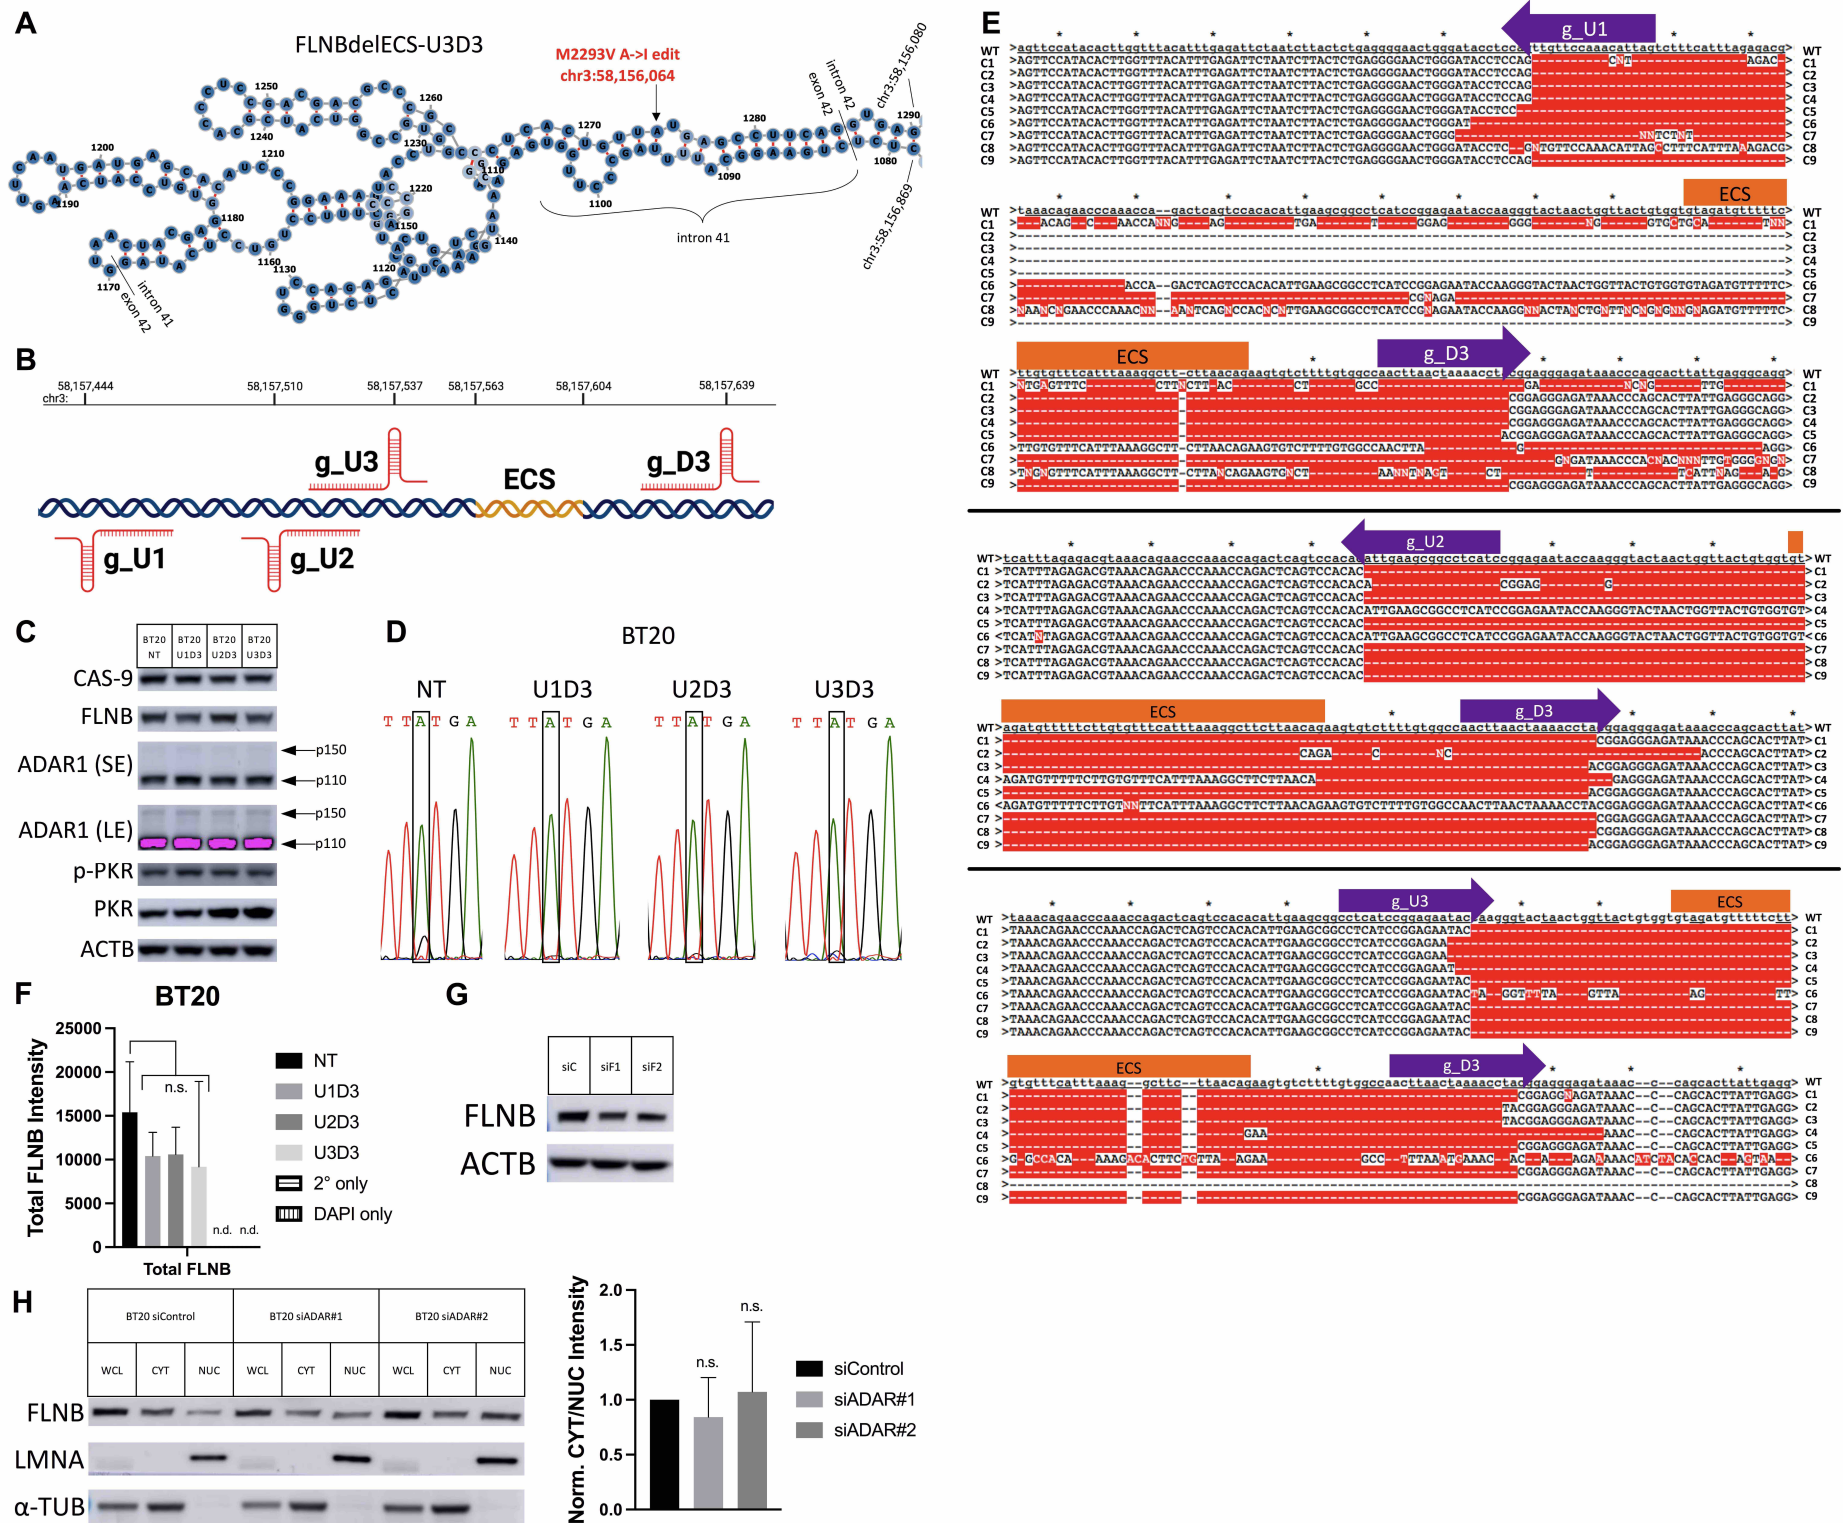

Figure S6

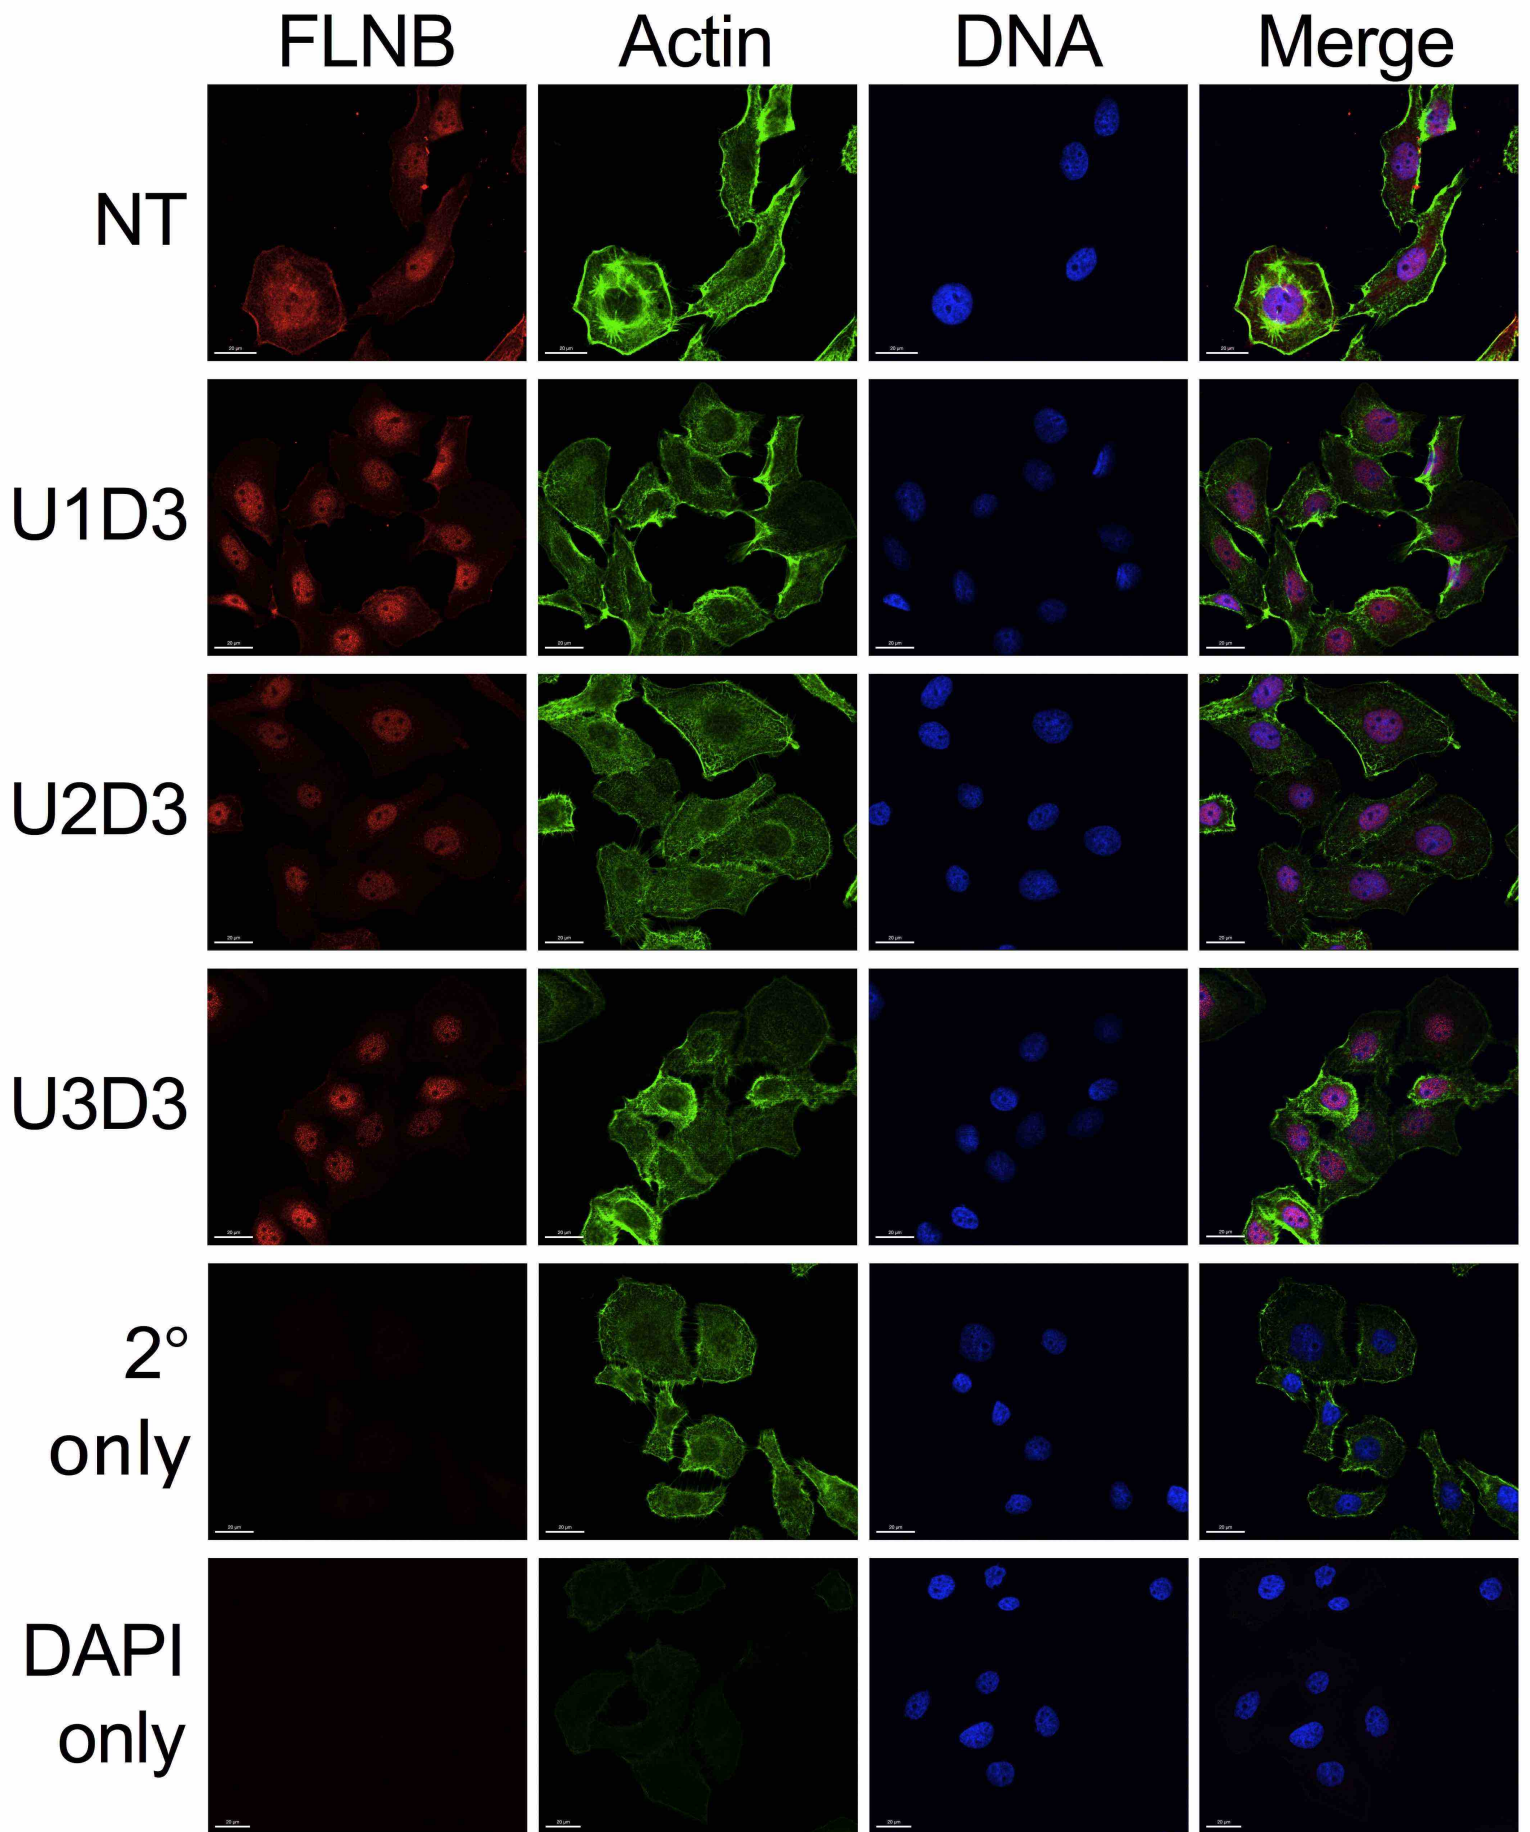

Figure S7

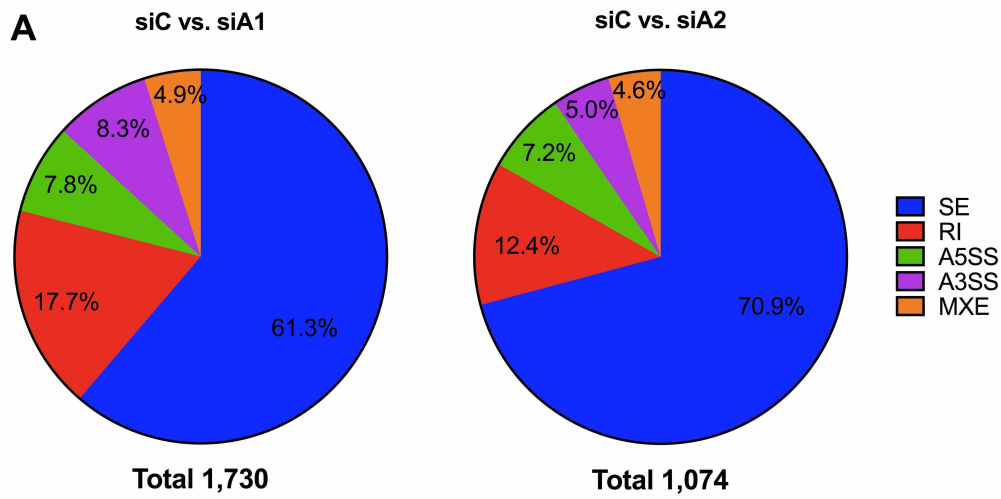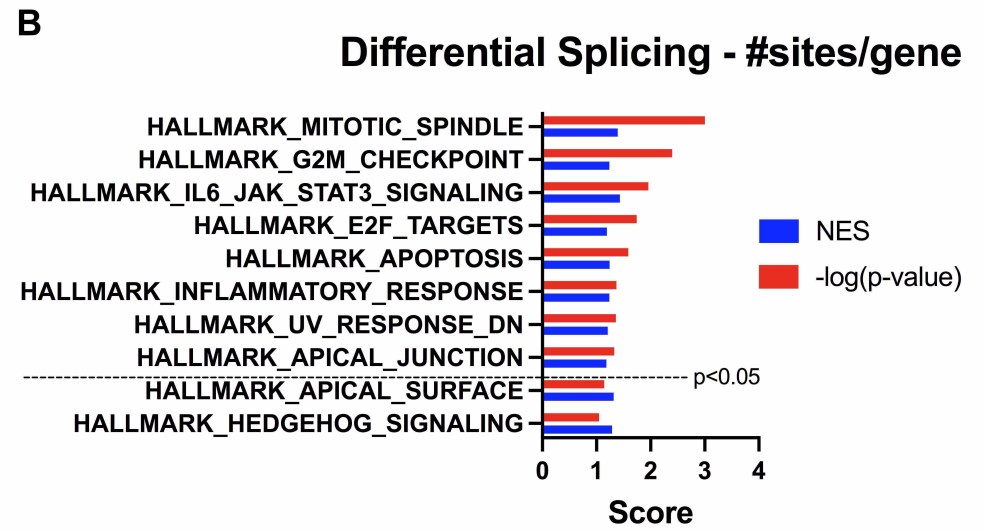

Figure S8
